# Supplementary material for: Diastereoselective Synthesis of Highly Functionalized Proline Derivatives
Source: MDPI journal article supplement (doi:10.3390/molecules27206898), 2022-10-14
Supplement: s1 [file s1]

# NMR spectra

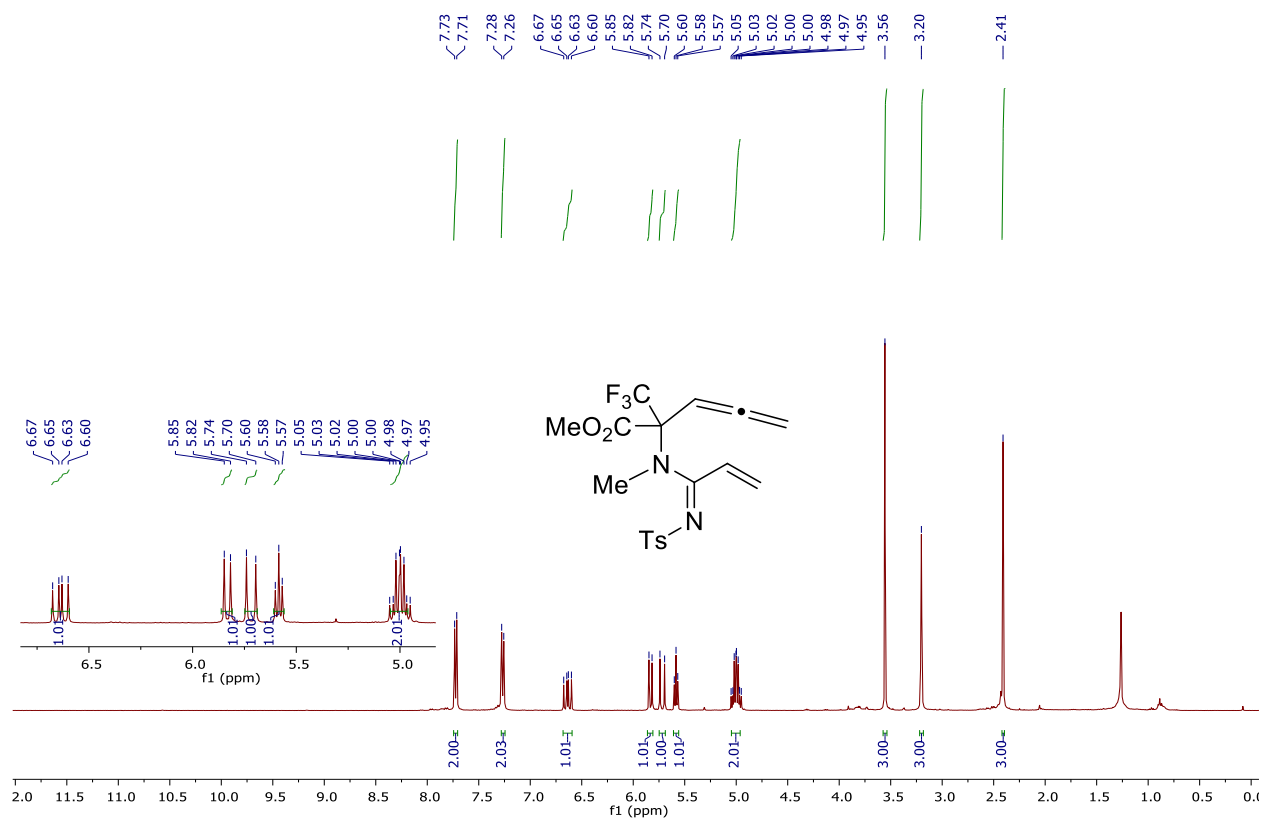

**Figure S1.** <sup>1</sup>H NMR spectrum of **3a** in CDCl<sub>3</sub>

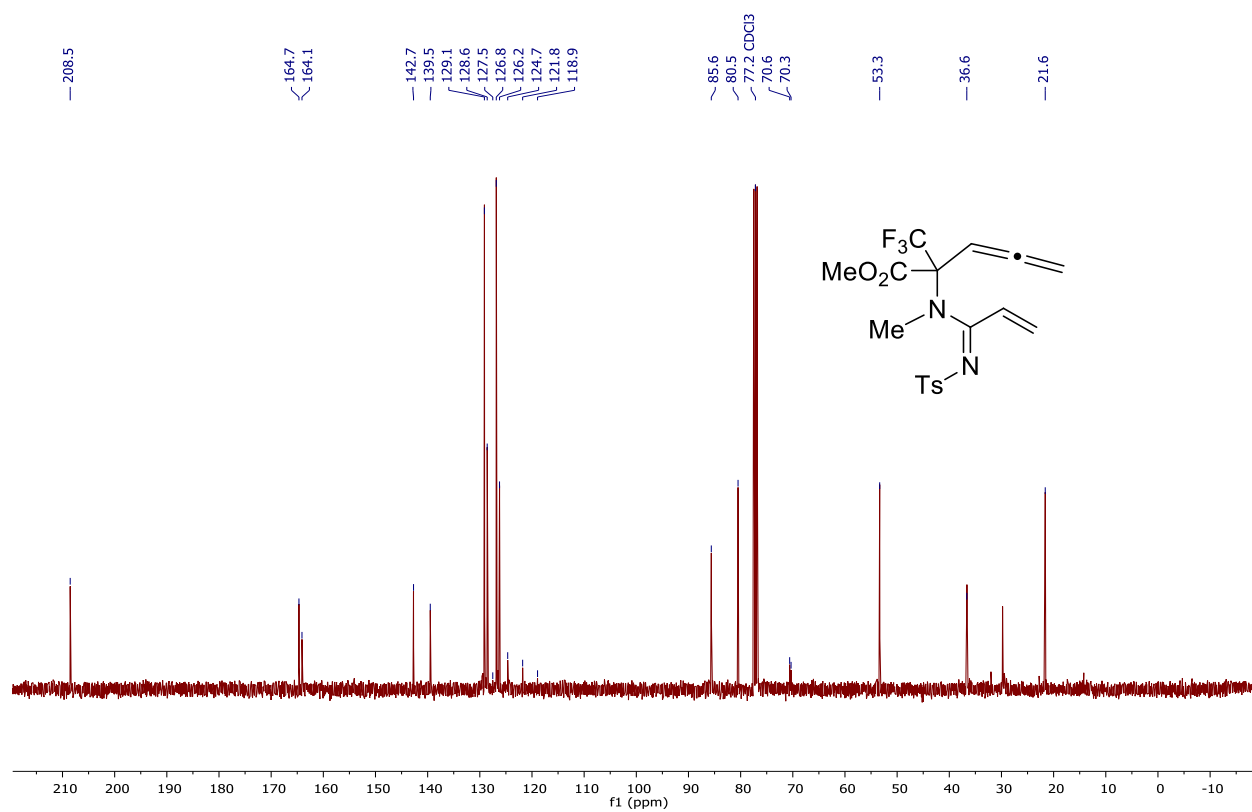

**Figure S2.** <sup>13</sup>C NMR spectrum of **3a** in CDCl<sub>3</sub>

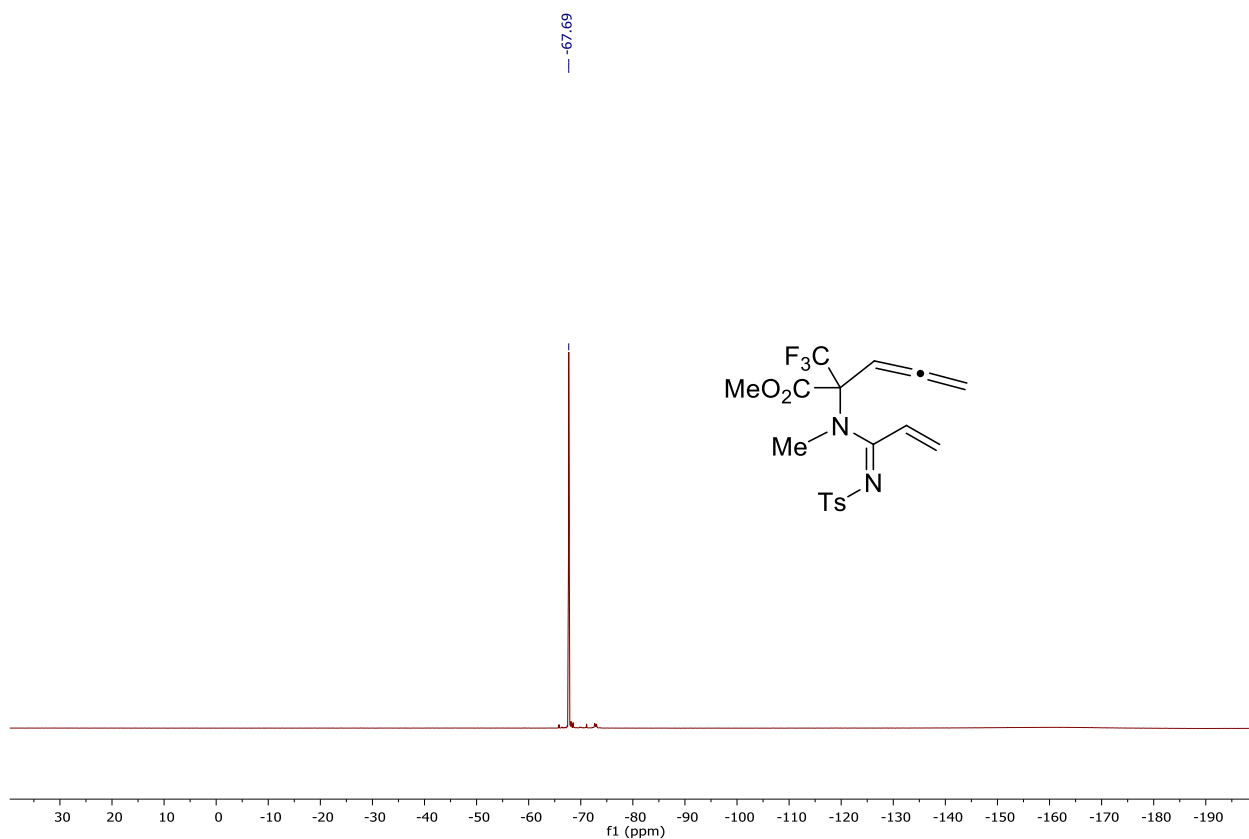

**Figure S3.** <sup>19</sup>F NMR spectrum of **3a** in CDCl<sub>3</sub>

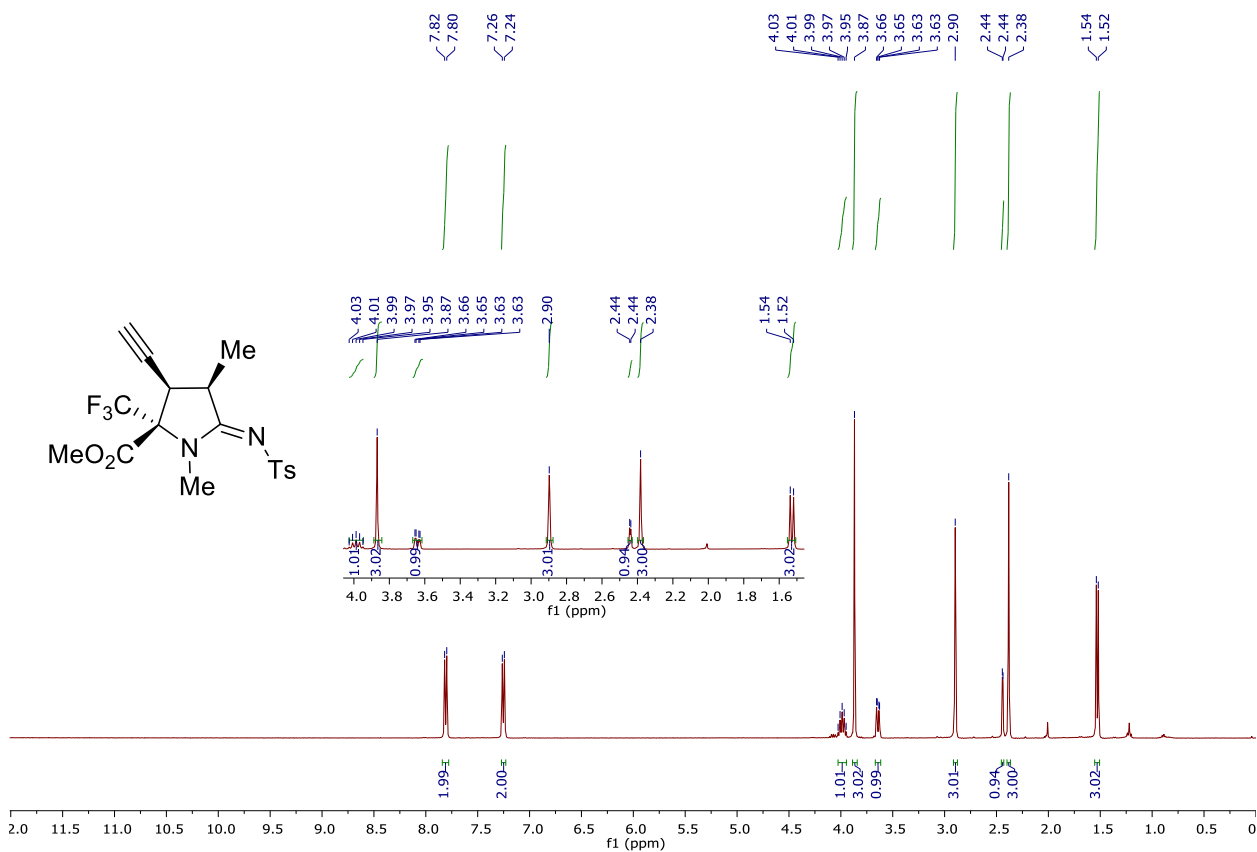

**Figure S4.** <sup>1</sup>H NMR spectrum of **4a** in CDCl<sub>3</sub>

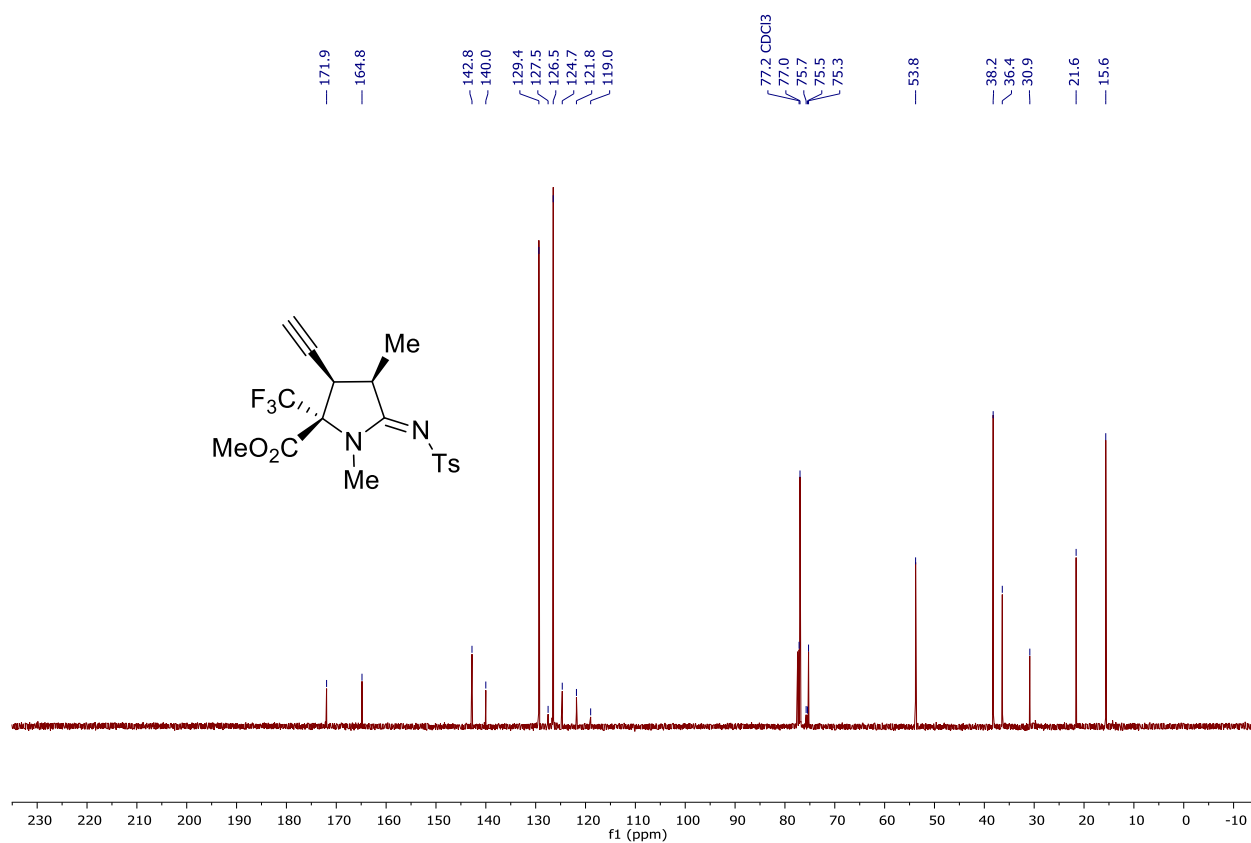

**Figure S5.** <sup>13</sup>C NMR spectrum of **4a** in CDCl<sub>3</sub>

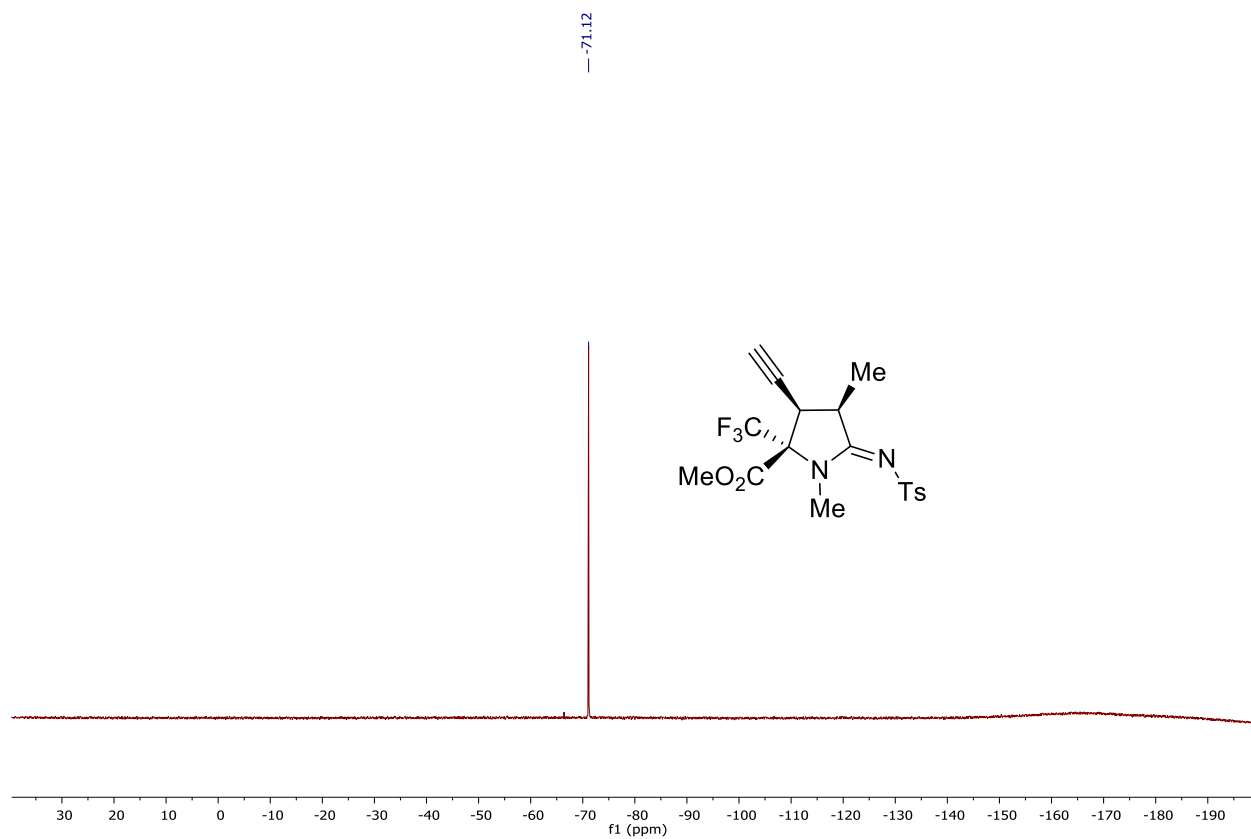

**Figure S6.** <sup>19</sup>F NMR spectrum of **4a** in CDCl<sub>3</sub>

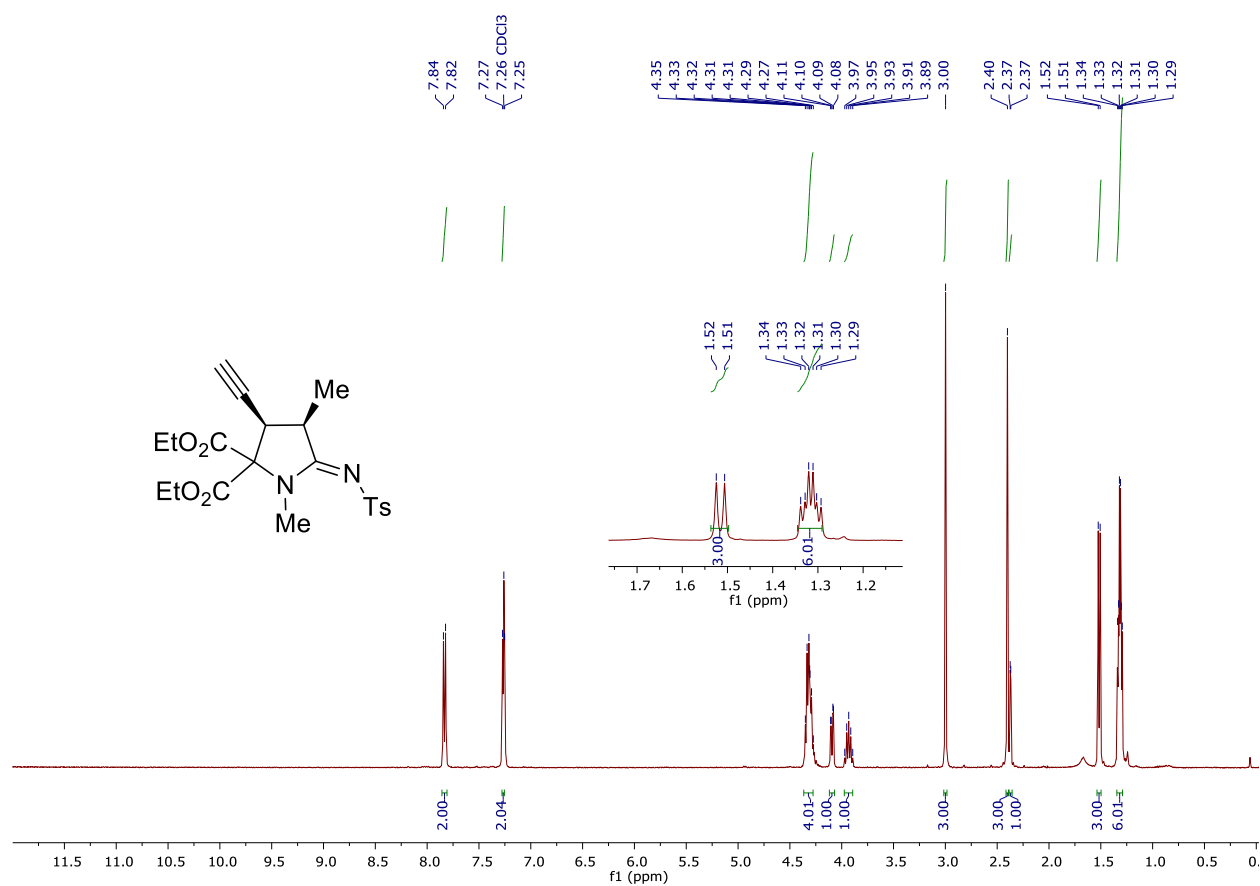

**Figure S7.** <sup>1</sup>H NMR spectrum of **4b** in CDCl<sub>3</sub>

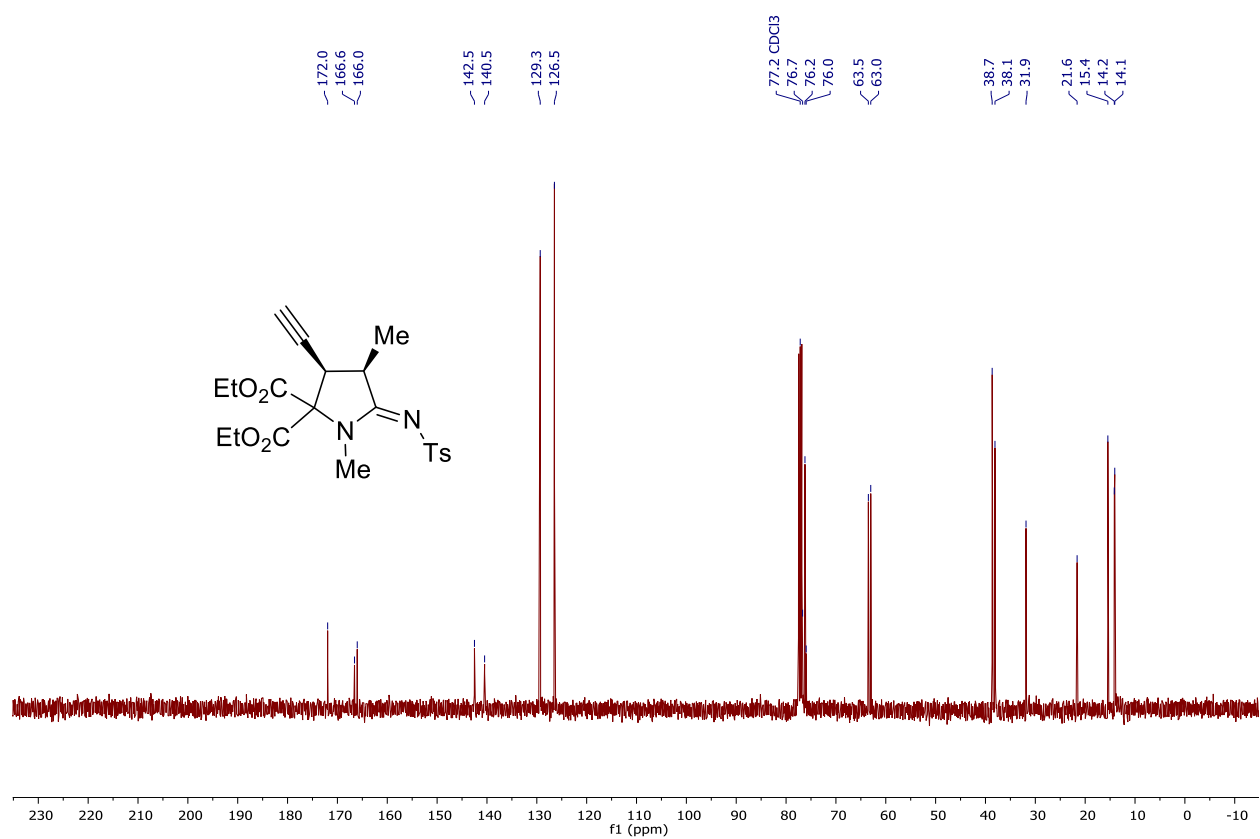

**Figure S8.** <sup>13</sup>C NMR spectrum of **4b** in CDCl<sub>3</sub>

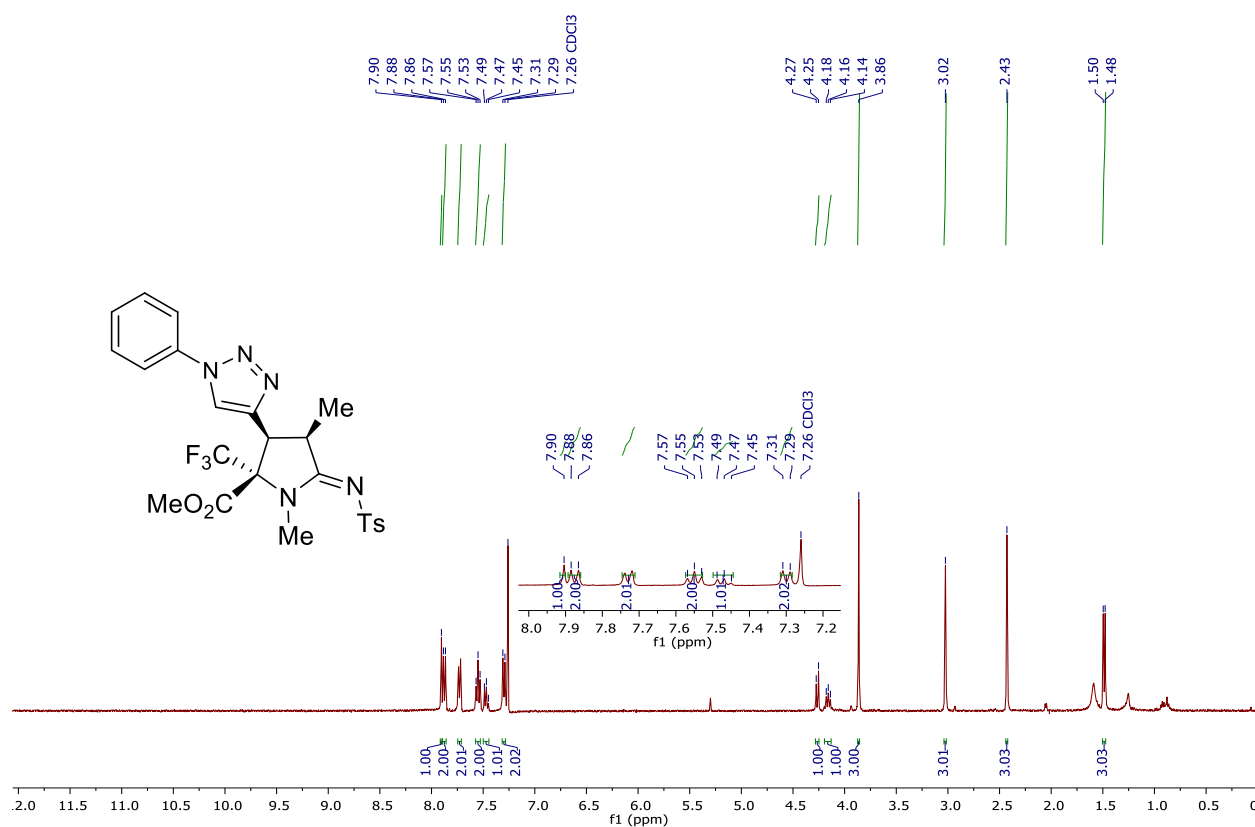

**Figure S9.** <sup>1</sup>H NMR spectrum of **5a** in CDCl<sub>3</sub>

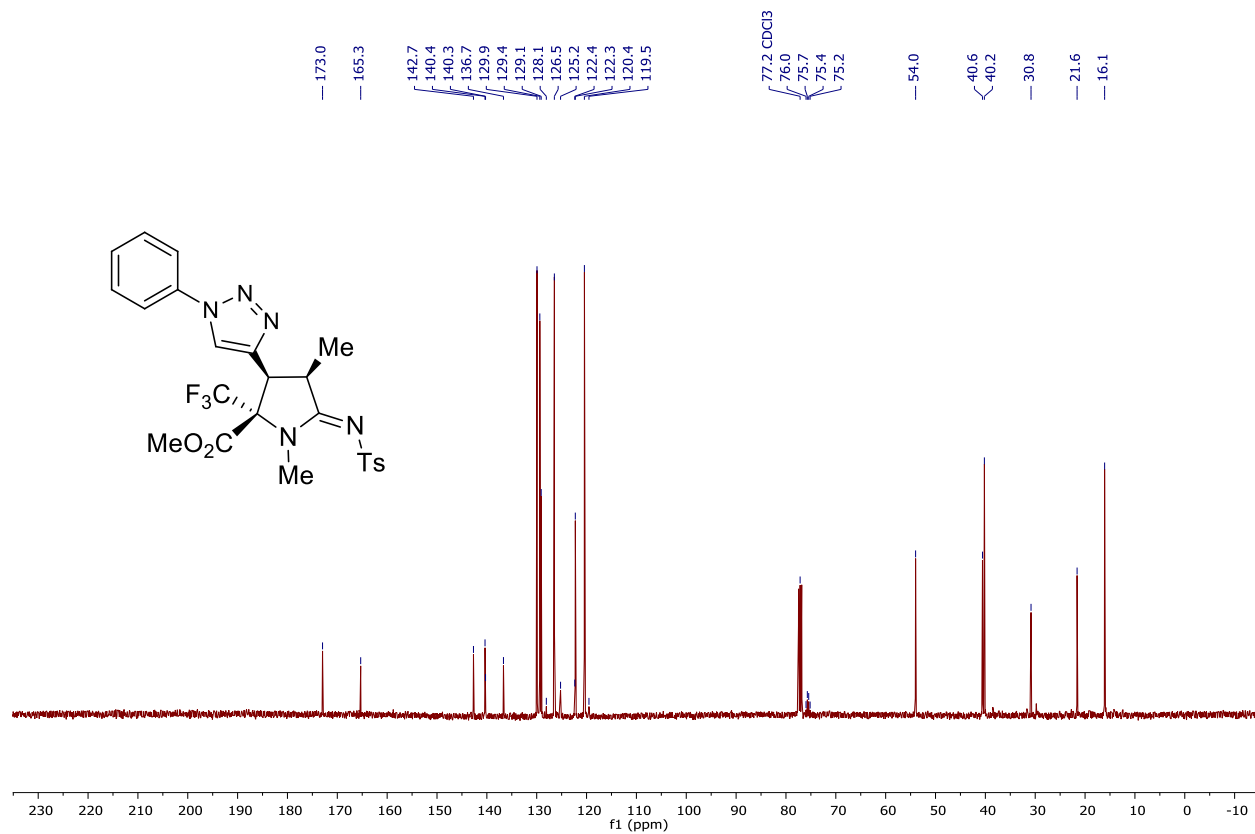

**Figure S10.** <sup>13</sup>C NMR spectrum of **5a** in CDCl<sub>3</sub>

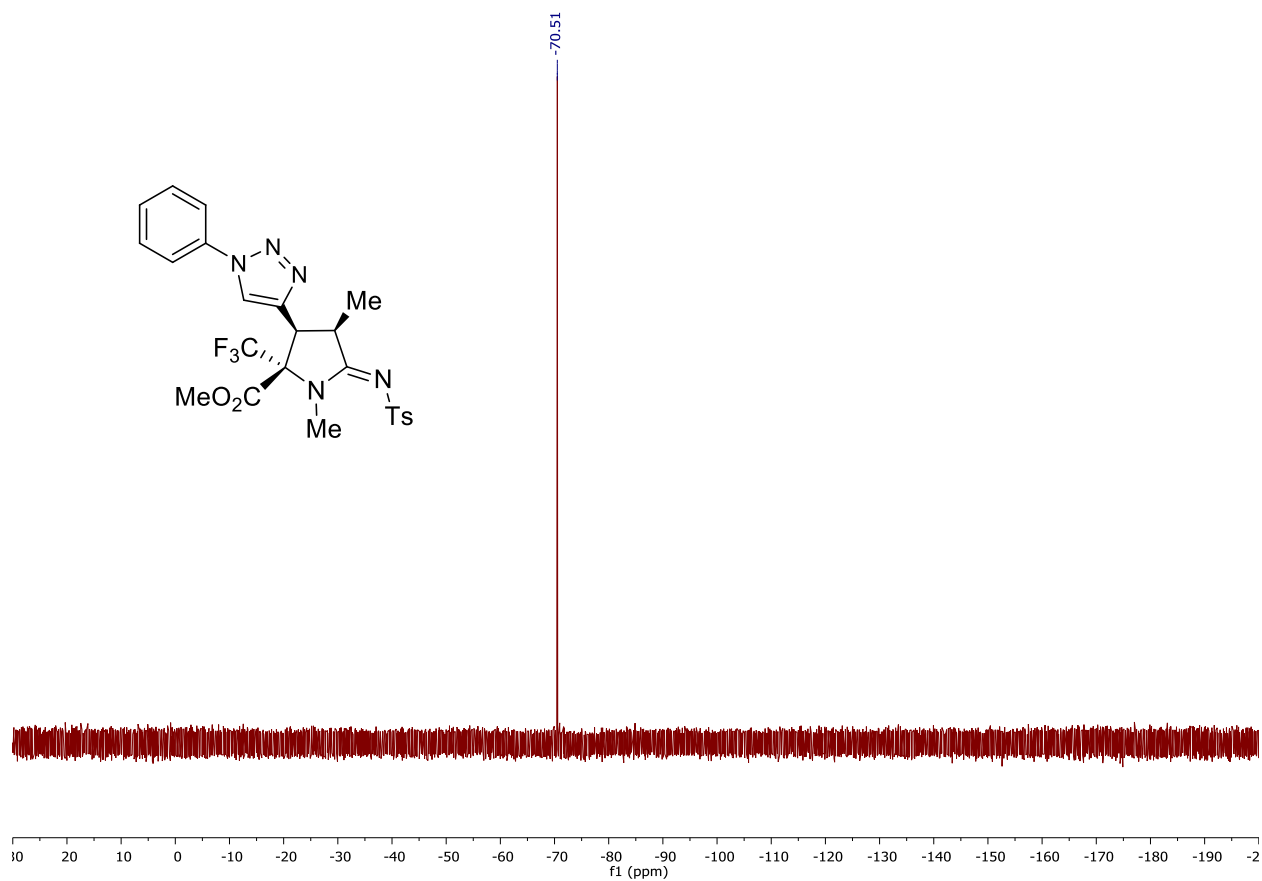

**Figure S11.**  $^{19}\text{F}$  NMR spectrum of **5a** in  $\text{CDCl}_3$

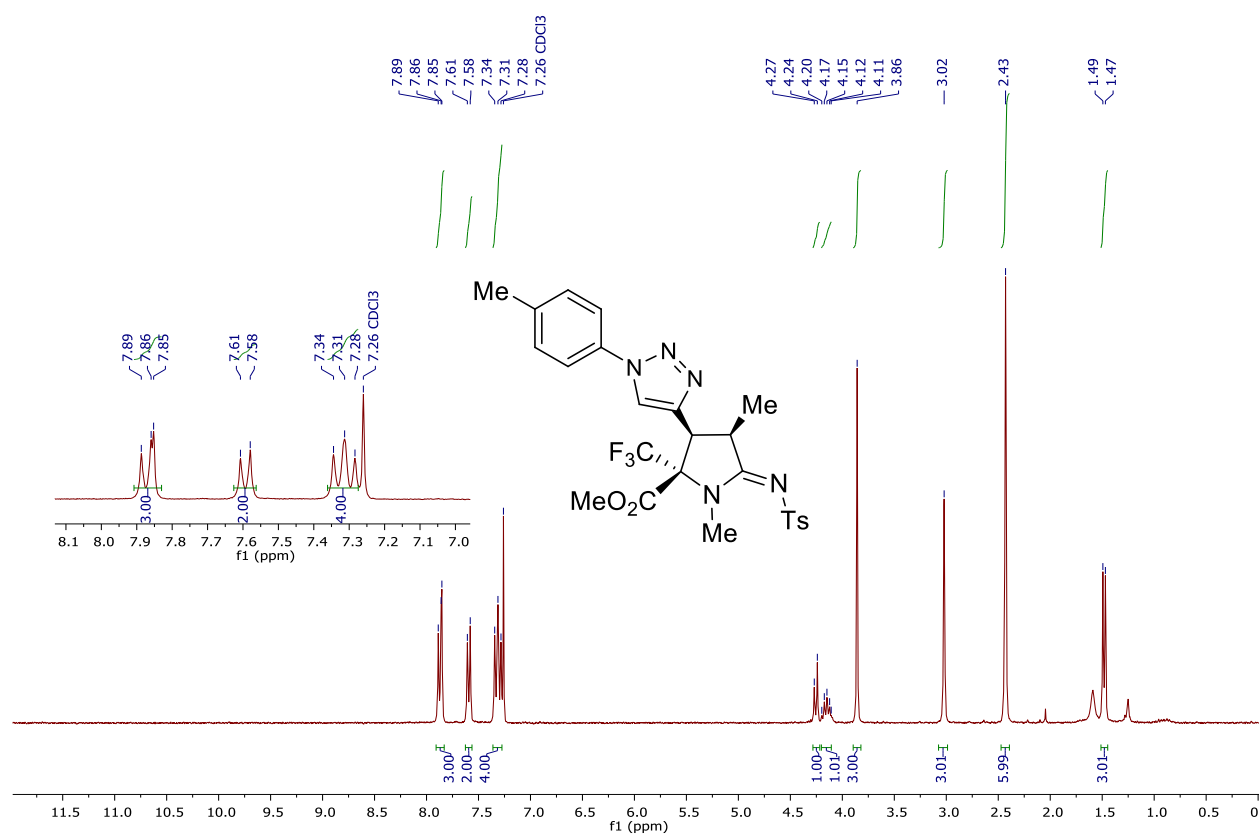

**Figure S12.**  $^1\text{H}$  NMR spectrum of **5b** in  $\text{CDCl}_3$

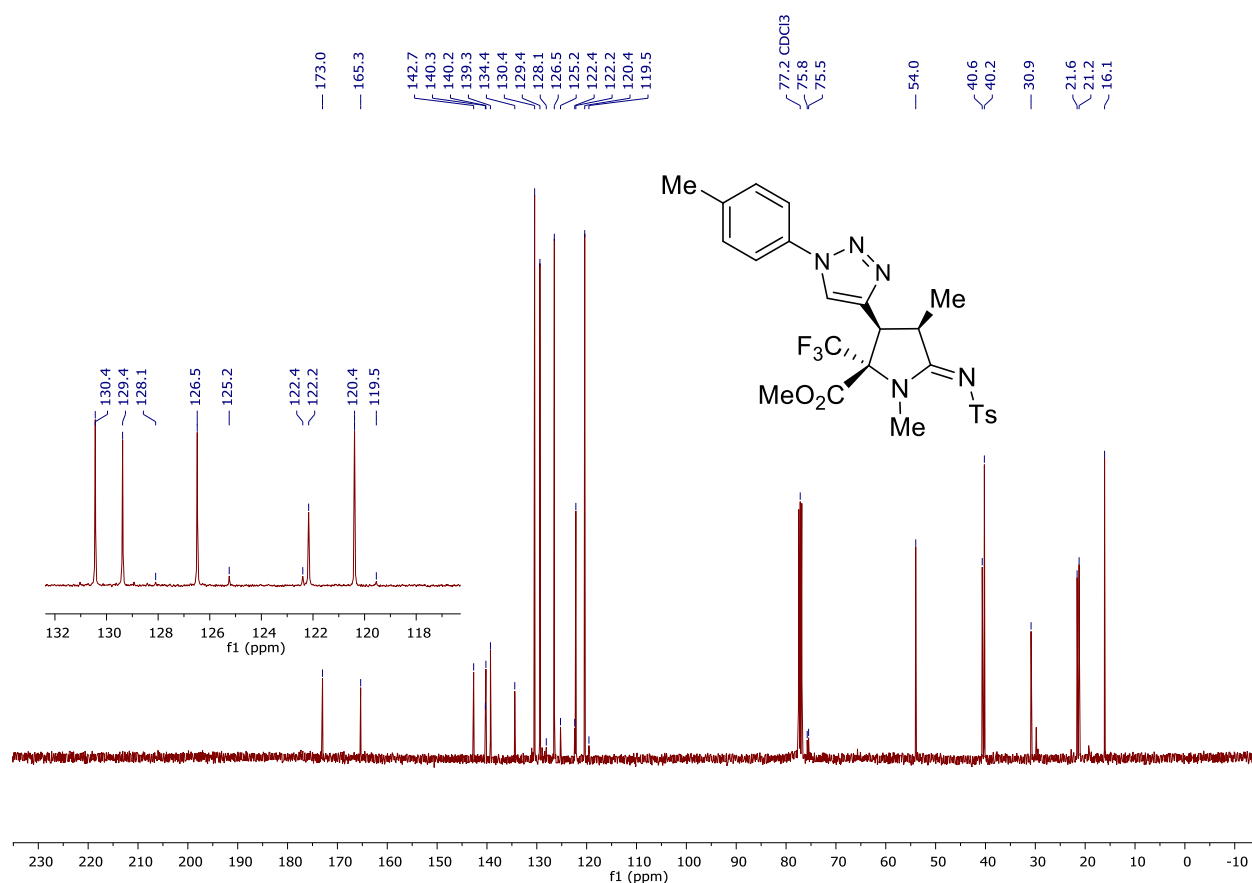

**Figure S13.** <sup>13</sup>C NMR spectrum of **5b** in CDCl<sub>3</sub>

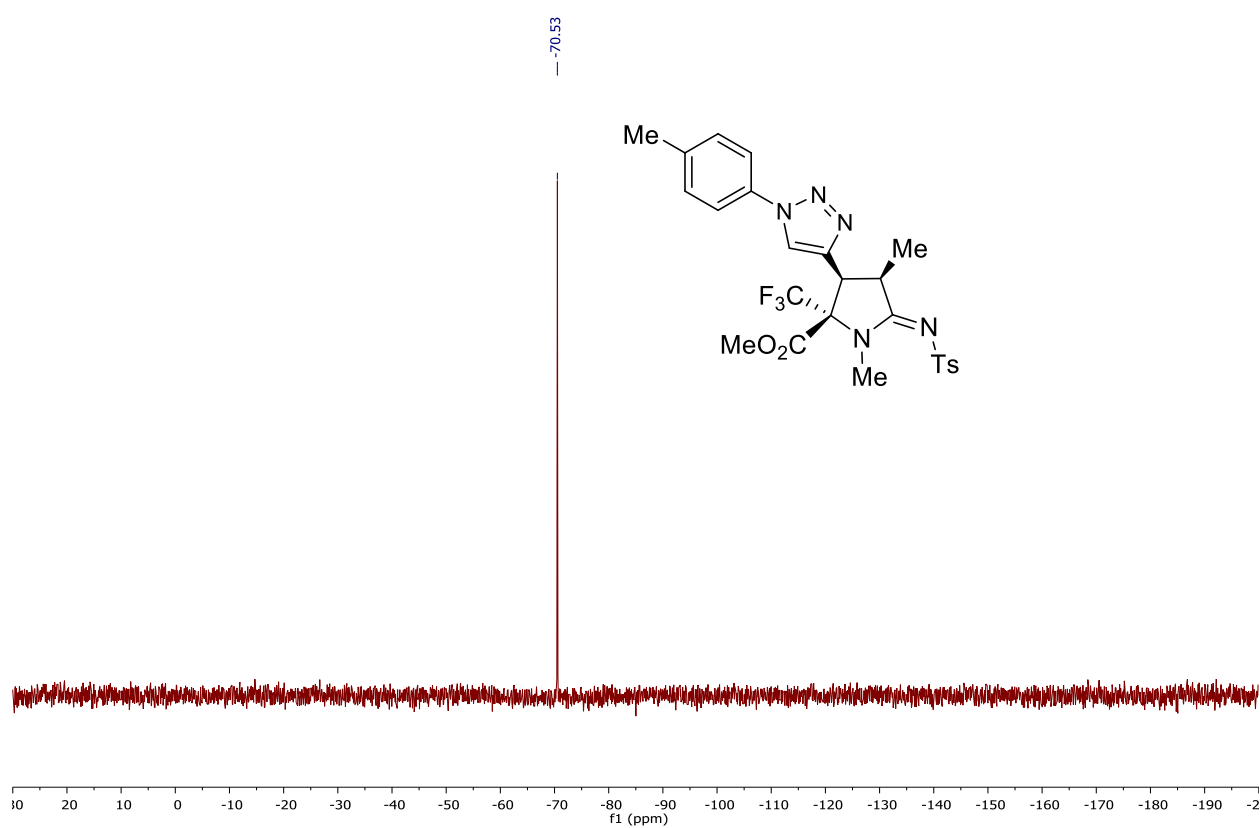

**Figure S14.** <sup>19</sup>F NMR spectrum of **5b** in CDCl<sub>3</sub>

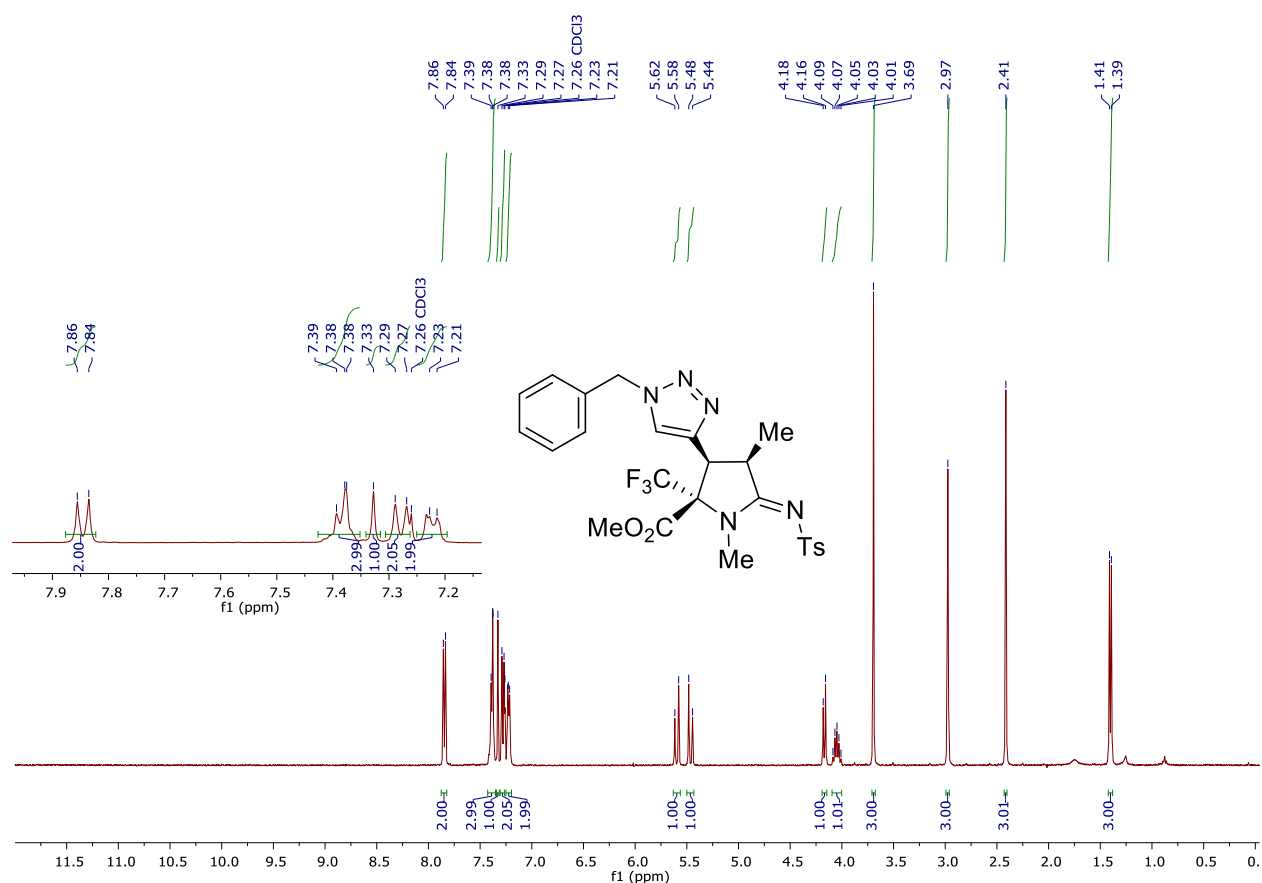

**Figure S15.  $^1\text{H}$  NMR spectrum of **5c** in  $\text{CDCl}_3$**

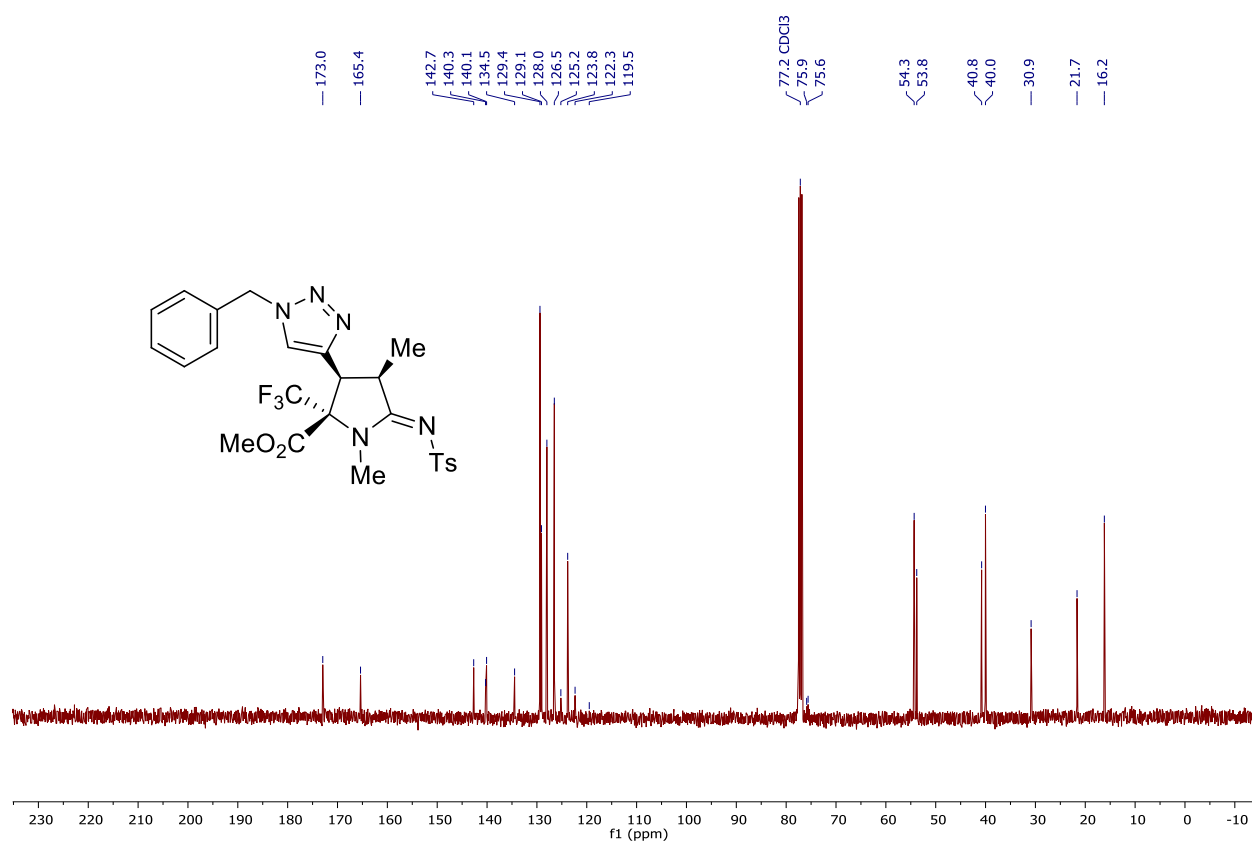

**Figure S16.  $^{13}\text{C}$  NMR spectrum of **5c** in  $\text{CDCl}_3$**



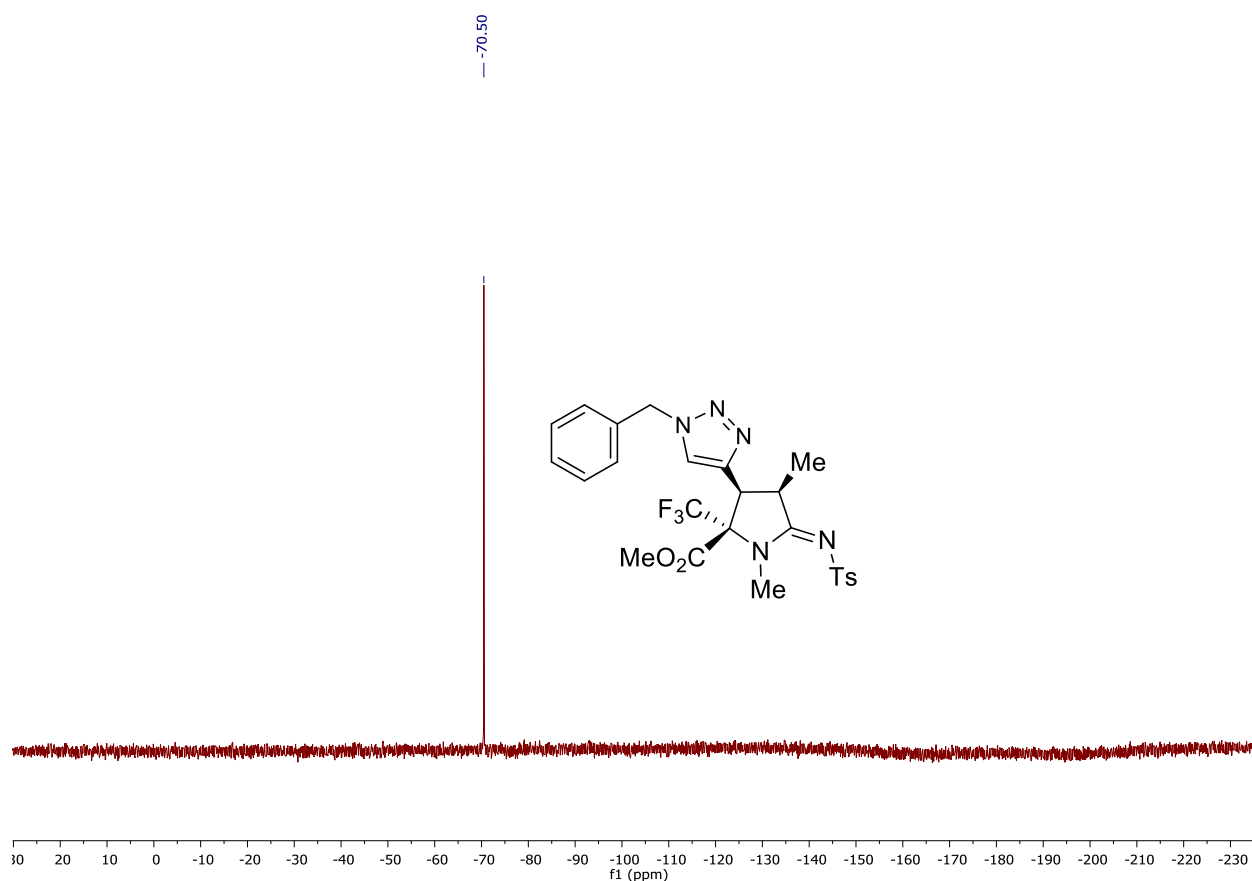

**Figure S17.**  $^{19}\text{F}$  NMR spectrum of **5c** in  $\text{CDCl}_3$

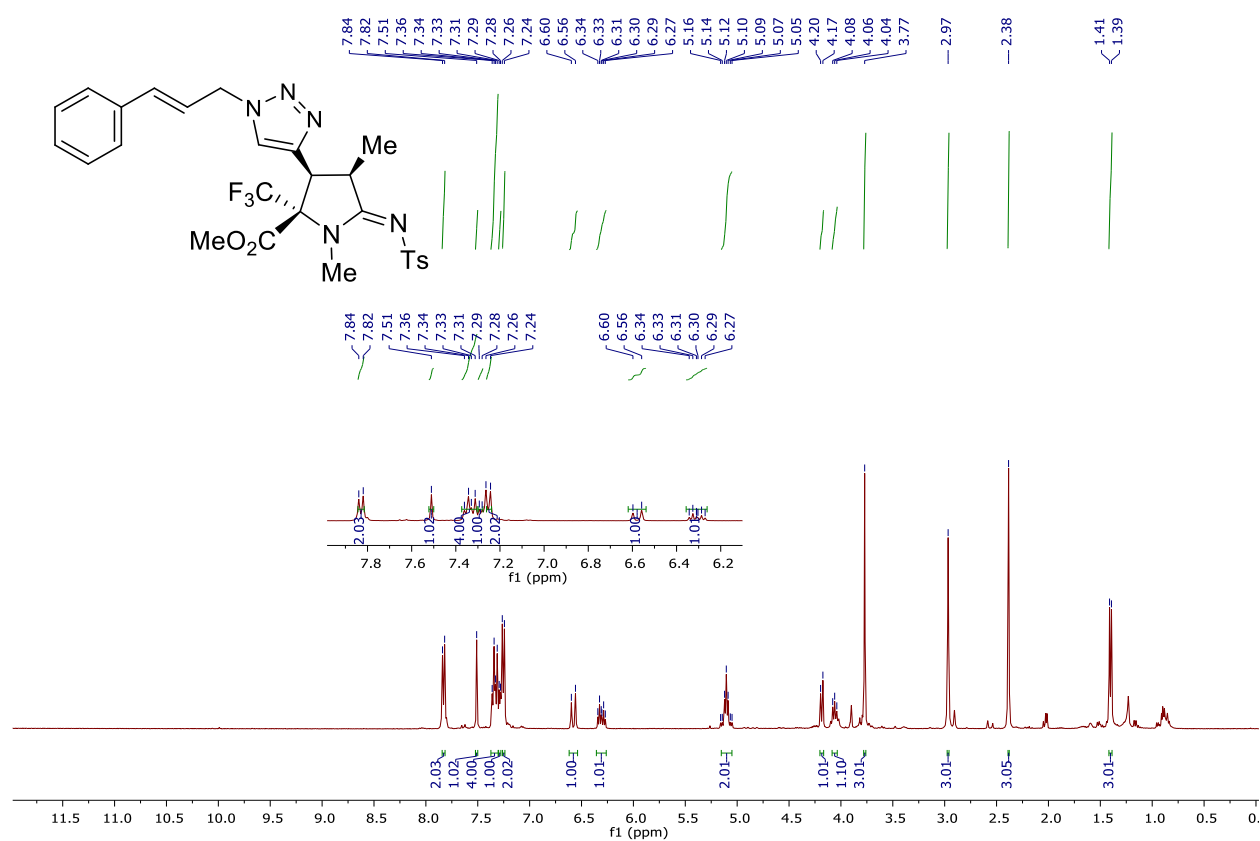

**Figure S18.**  $^1\text{H}$  NMR spectrum of **5d** in  $\text{CDCl}_3$

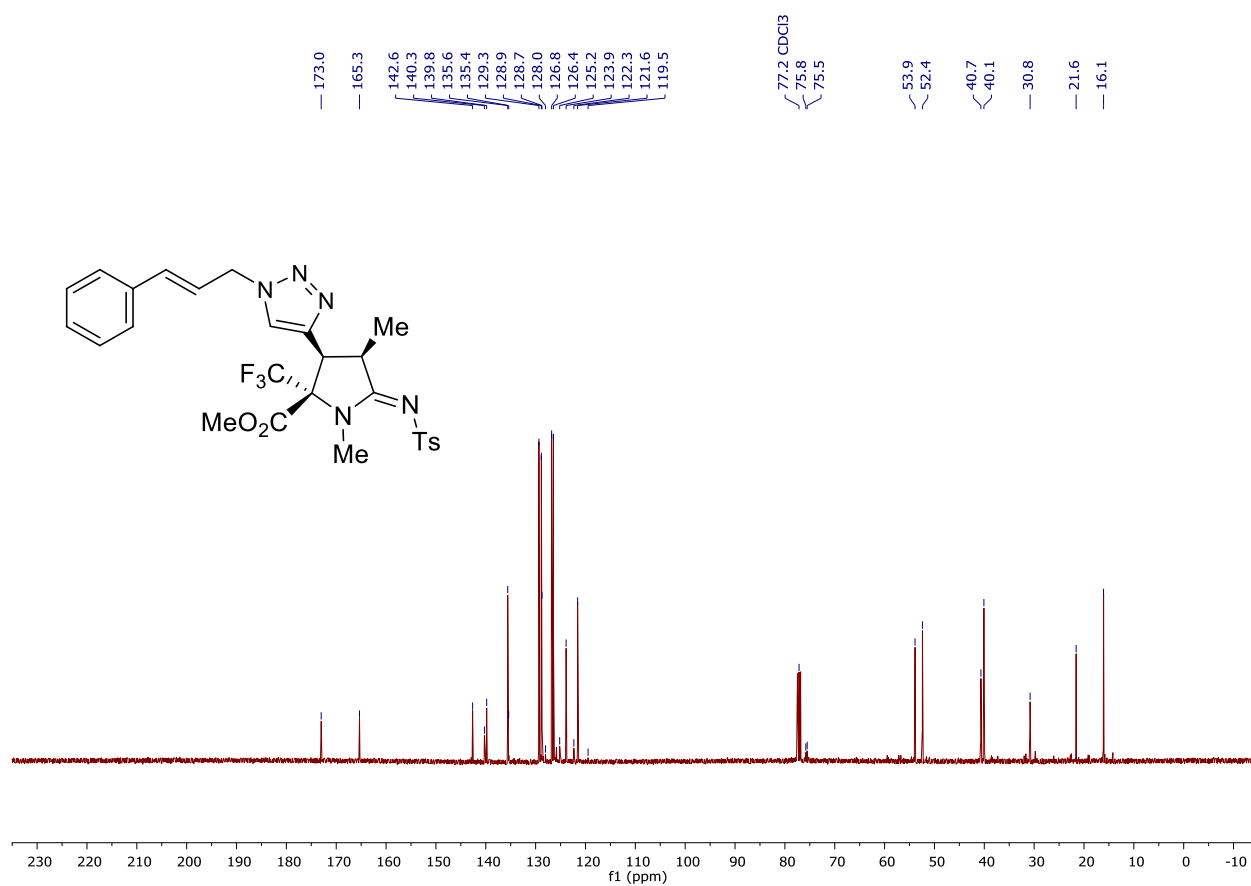

**Figure S19.** <sup>13</sup>C NMR spectrum of **5d** in CDCl<sub>3</sub>

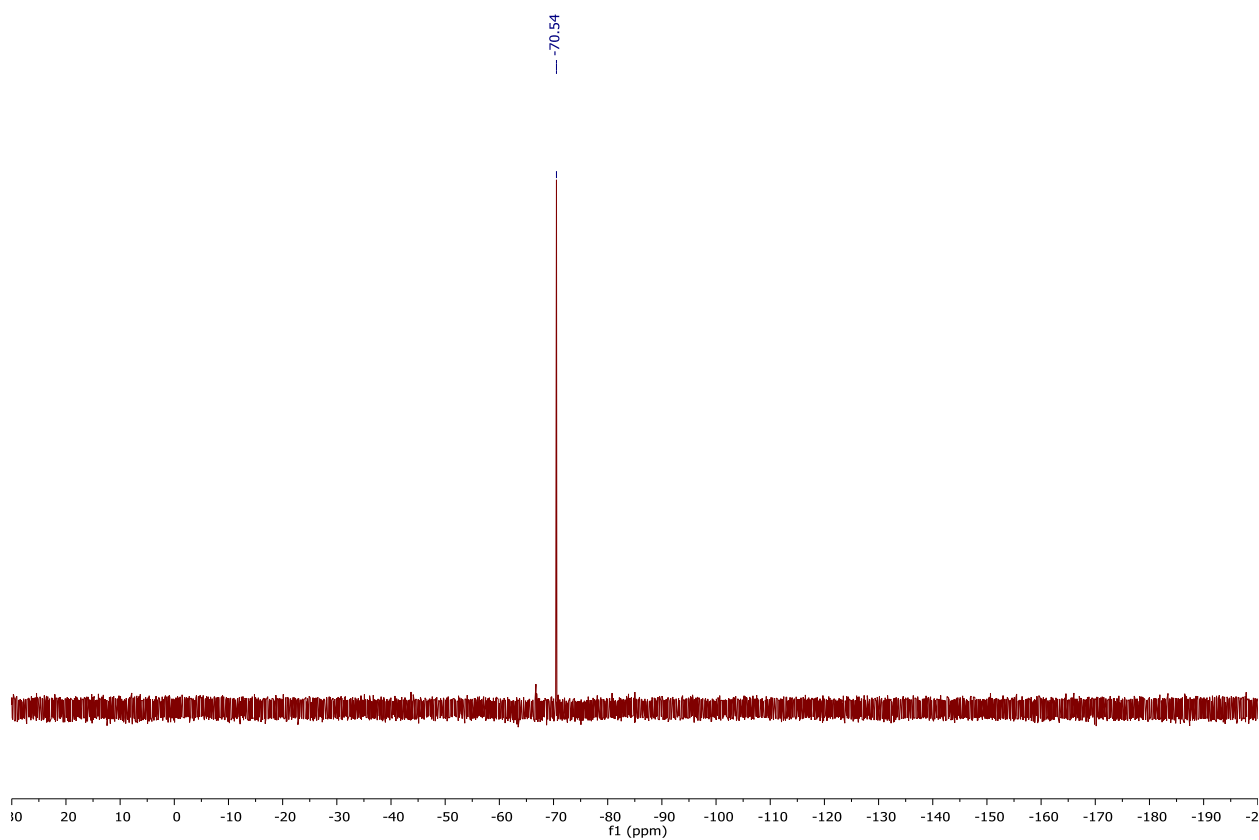

**Figure S20.** <sup>19</sup>F NMR spectrum of **5d** in CDCl<sub>3</sub>

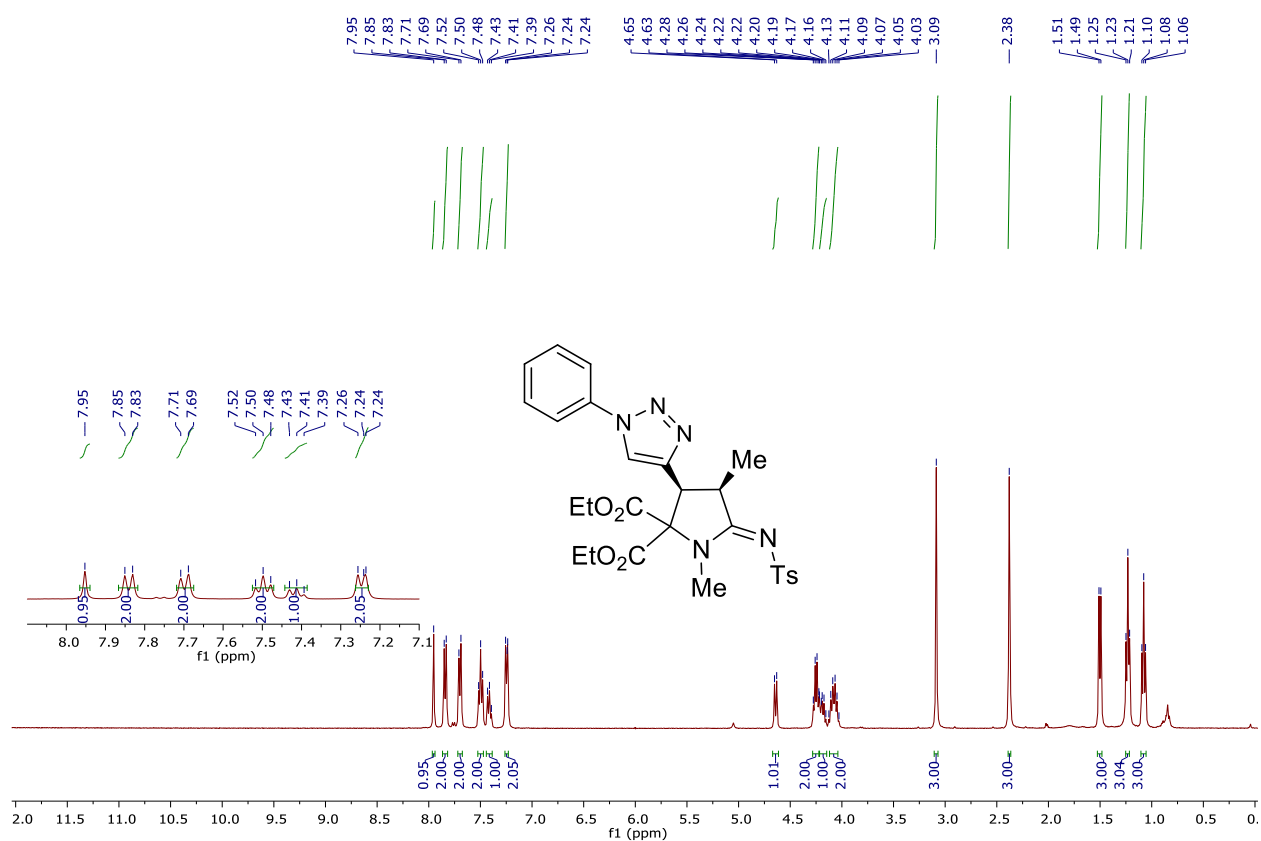

**Figure S21.** <sup>1</sup>H NMR spectrum of **6a** in CDCl<sub>3</sub>

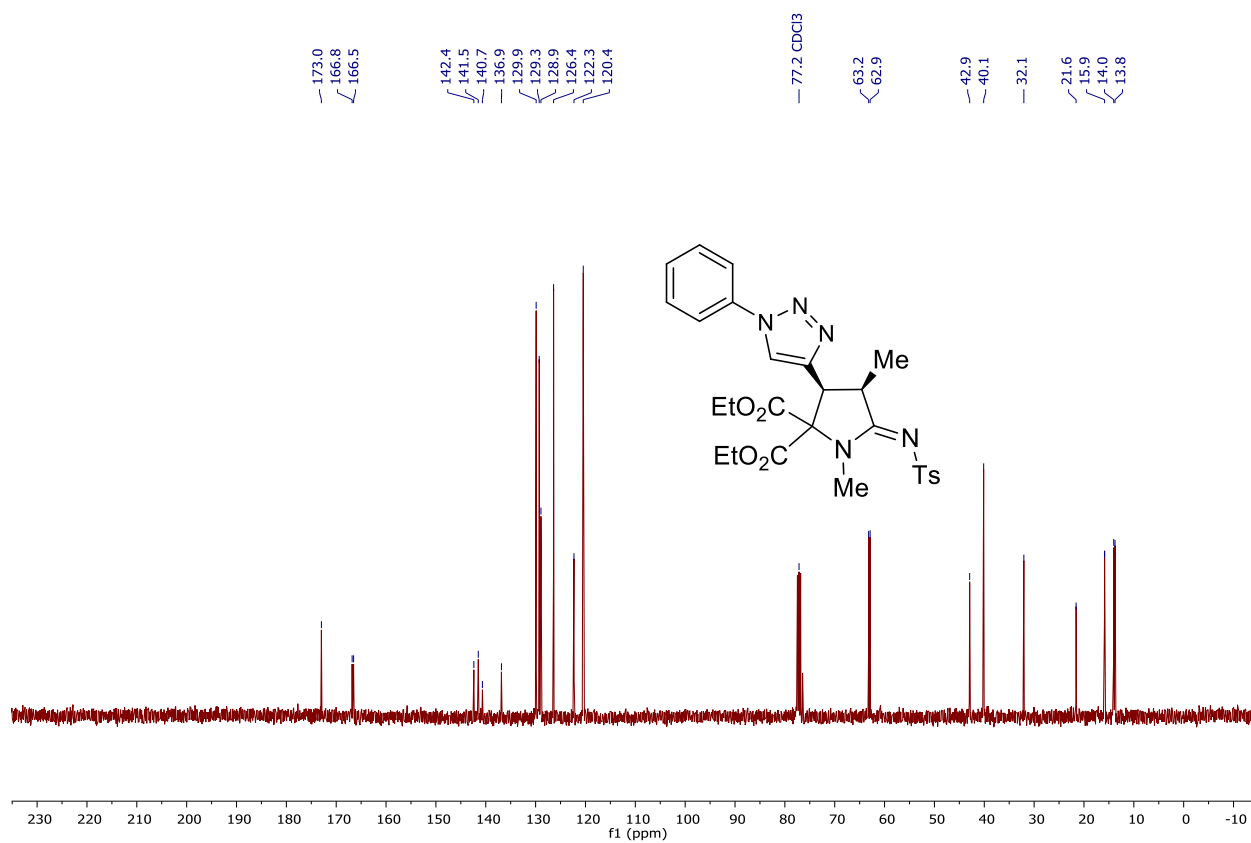

**Figure S22.** <sup>13</sup>C NMR spectrum of **6a** in CDCl<sub>3</sub>

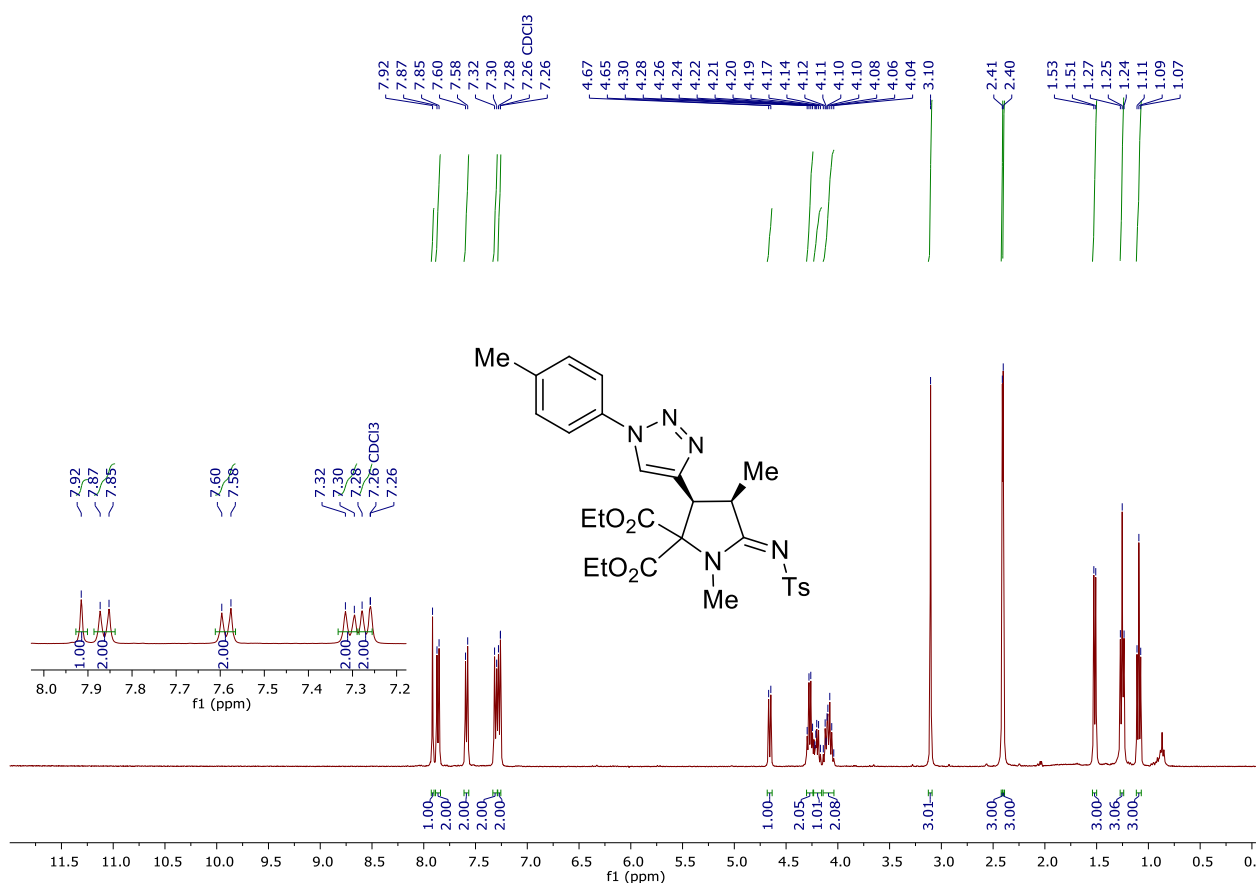

**Figure S23.** <sup>1</sup>H NMR spectrum of **6b** in CDCl<sub>3</sub>

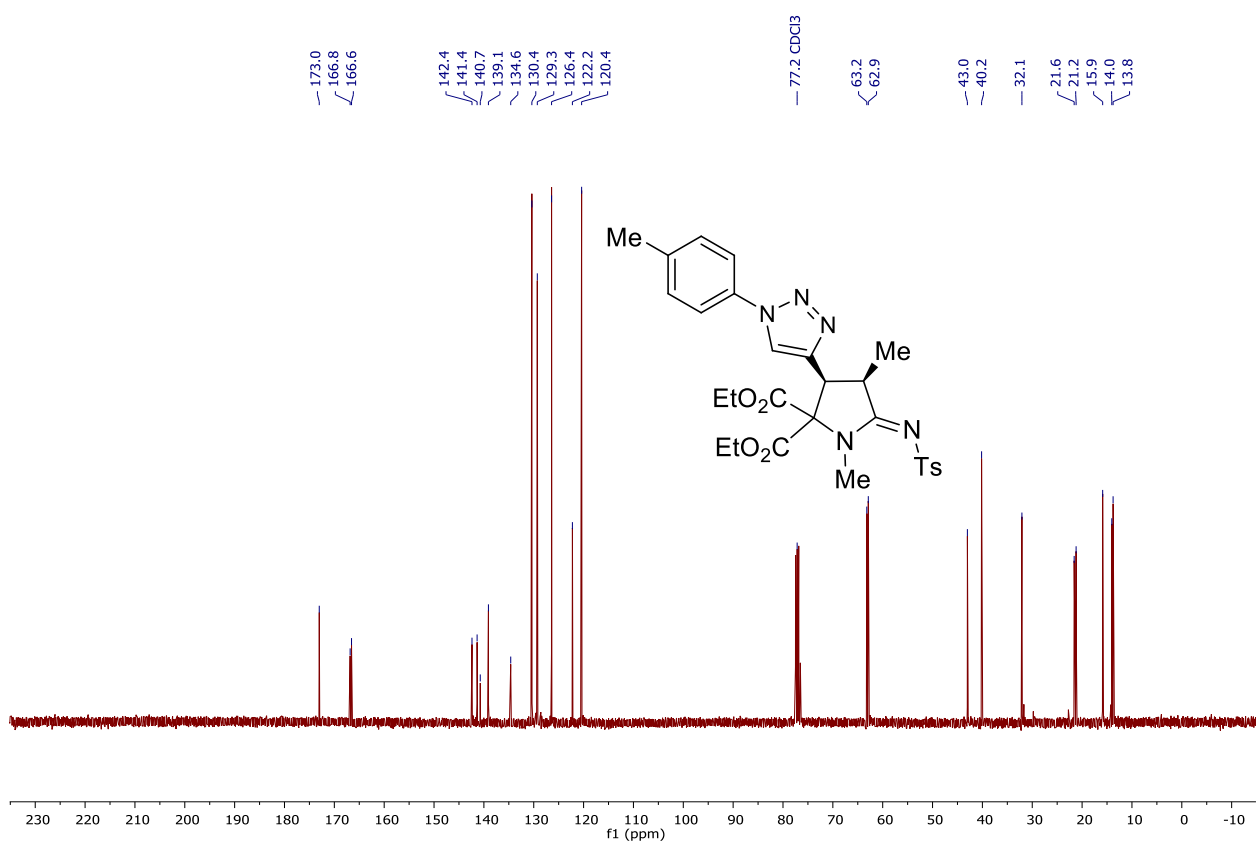

**Figure S24.** <sup>13</sup>C NMR spectrum of **6b** in CDCl<sub>3</sub>

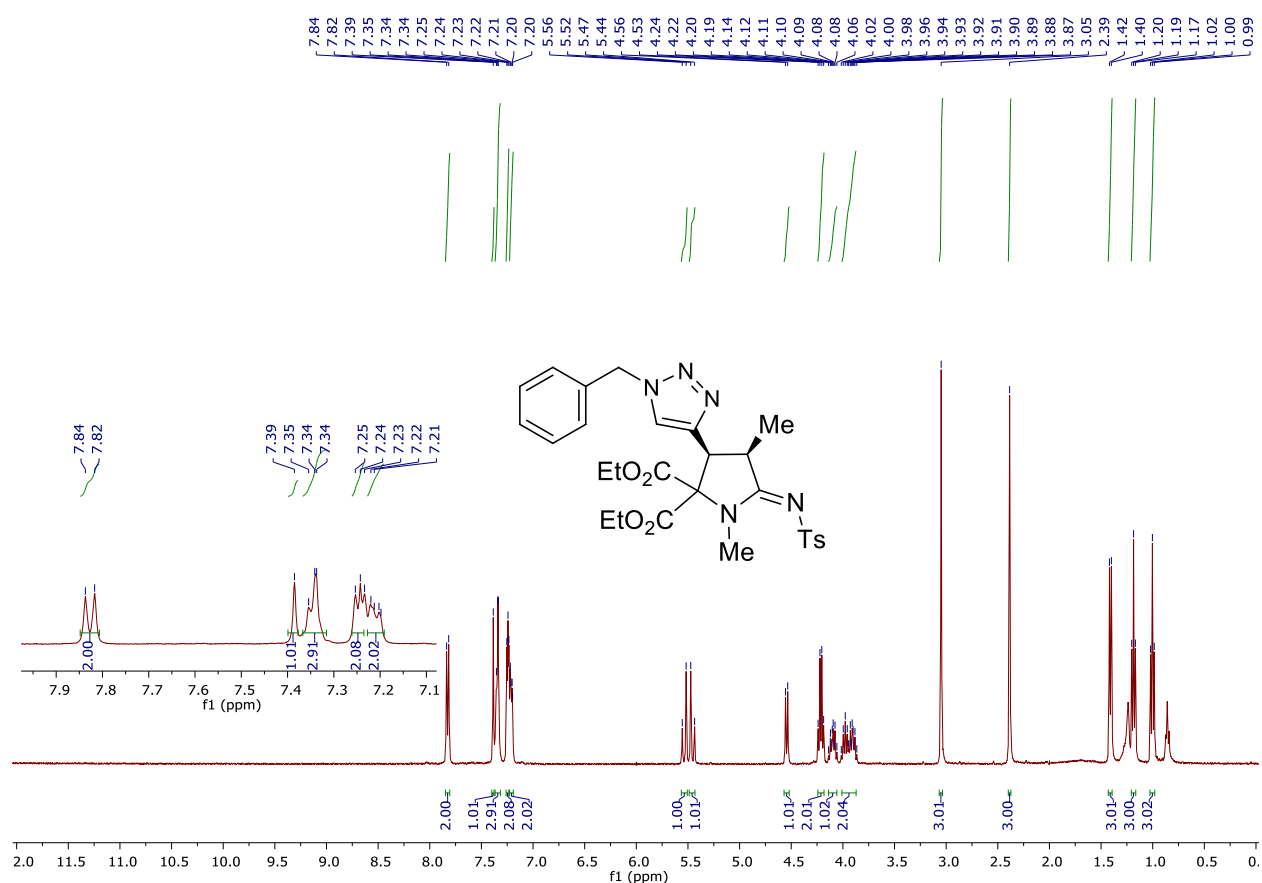

**Figure S25.** <sup>1</sup>H NMR spectrum of **6c** in CDCl<sub>3</sub>

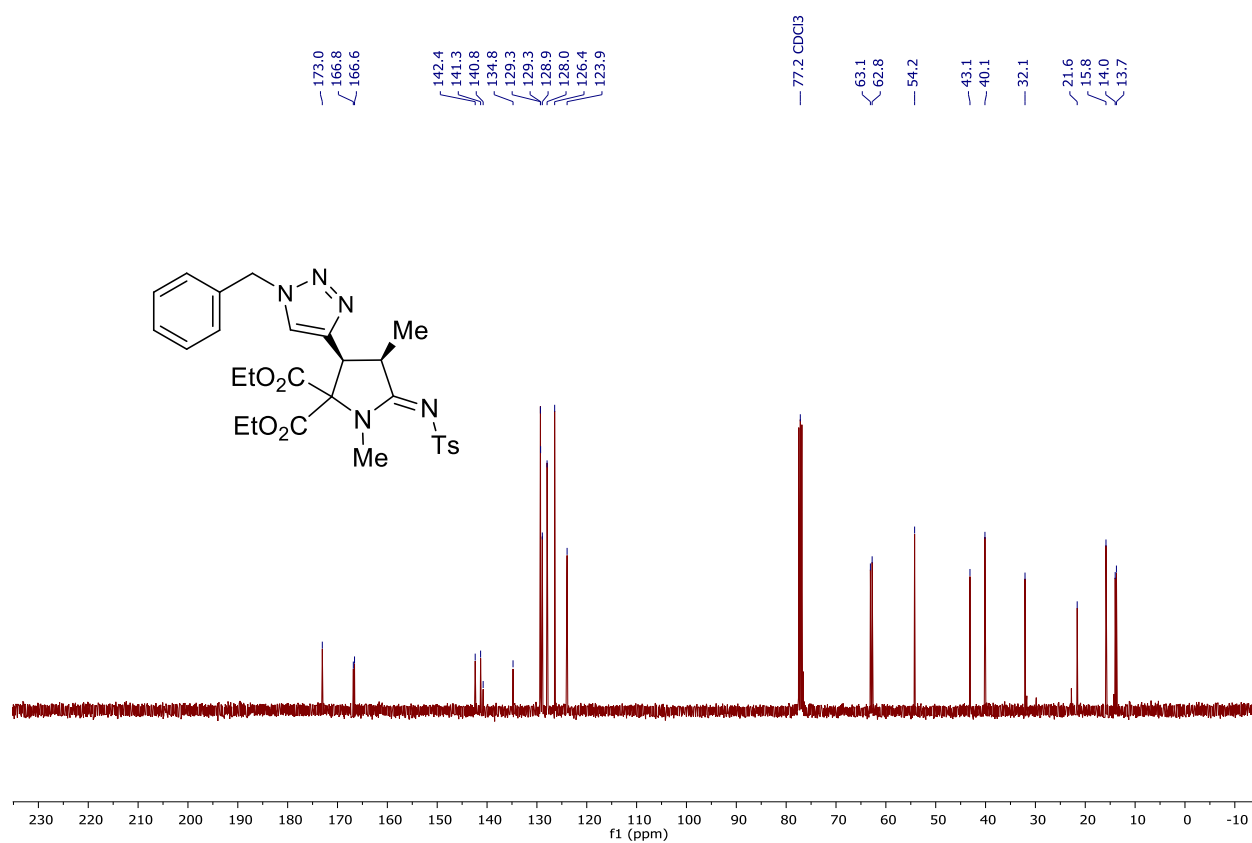

**Figure S26.** <sup>13</sup>C NMR spectrum of **6c** in CDCl<sub>3</sub>
